# Supplementary material
Source: PubMed Central journal article supplement (PMC2755863)

## SUPPLEMENTAL FIGURE LEGENDS

**FIGURE S1. Localization of the deuteration level change using overlapping peptides for the TIR domain at 6 different time points in PdTIR vs. PdTLP samples.** Changes in deuteration level upon dimerization are illustrated using a color scheme (Blue: decreased; Red: increased; Grey: residues excluded from the calculation due to their fast exchange rates while at the N-terminus of the peptide). The region from 259 to 286 is significantly protected (more than 10%) upon dimerization while other regions of the TIR domain are not affected. Residues involved in forming hydrogen bonds as observed in the crystal structure dimerization interface are highlighted in bold and underlined.

Figure S1

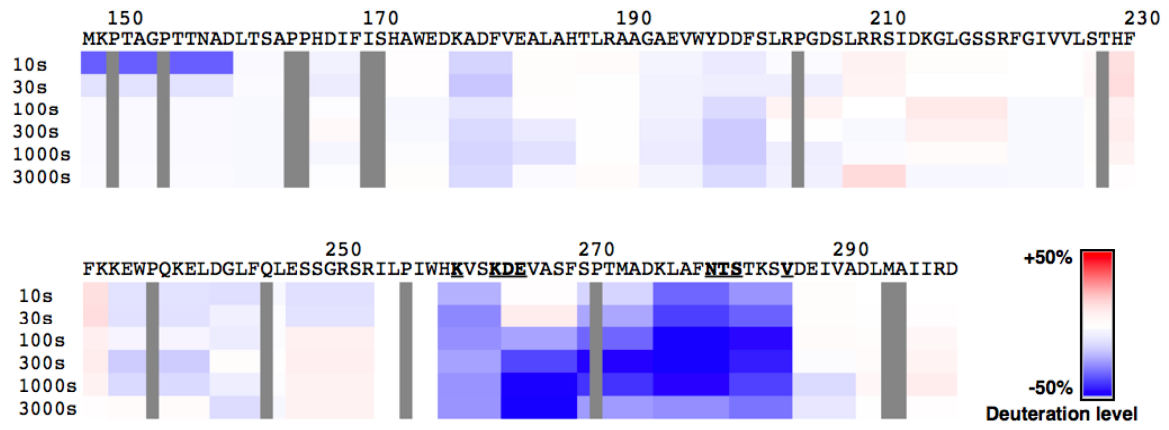

Supplement: supp_C109.007591_jbc.C109.007591-1.pdf [file supp_C109.007591_jbc.C109.007591-1.pdf]
